# Supplementary material for: Nanodiamond based supermolecular nanocomposites: preparation and biocompatibility evaluation
Source: Royal Society of Chemistry journal article supplement (doi:10.1039/c5ra19248j), 2015-01-01
Supplement: c5ra19248j1.pdf [file c5ra19248j1.pdf]

**Nanodiamond Based Supramolecular Nanocomposites: Preparation and Biocompatibility  
Evaluation**

Meiying Liu<sup>a</sup>, Dazhuang Xu<sup>a</sup>, Ke Wang<sup>b</sup>, Fengjie Deng<sup>a</sup>, Qing Wan<sup>a</sup>, Guangjian Zeng<sup>a</sup>, Qiang Huang<sup>a</sup>,  
Xiaoyong Zhang<sup>a,\*</sup>, Yen Wei<sup>b,\*</sup>

<sup>a</sup> Department of Chemistry, Nanchang University, Nanchang 330031, China; <sup>b</sup> Department of  
Chemistry and the Tsinghua Center for Frontier Polymer Research, Tsinghua University, Beijing,  
100084, P. R. China.

## Results

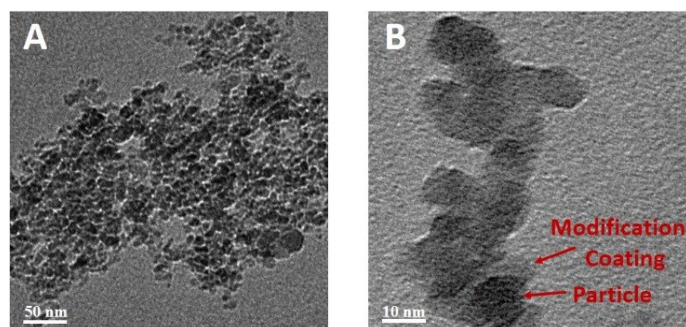

**Fig. S1.** Representative TEM images of ND (A) and the successful surface modification sample ND-Ad/β-CD (B).

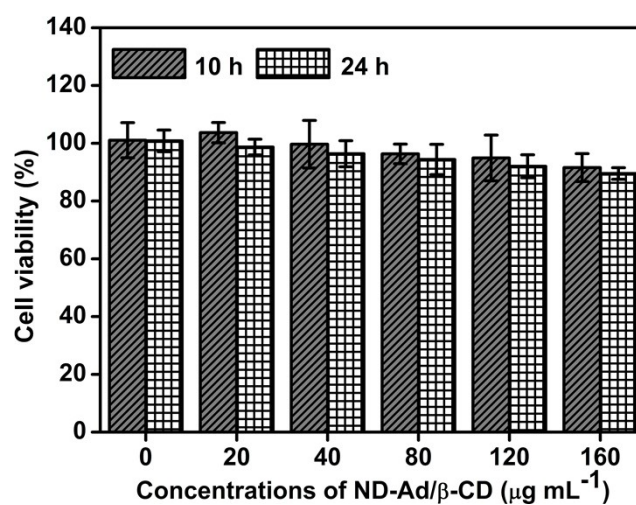

**Fig. S2** Biocompatibility evaluation of ND-Ad/β-CD towards A549 cells.

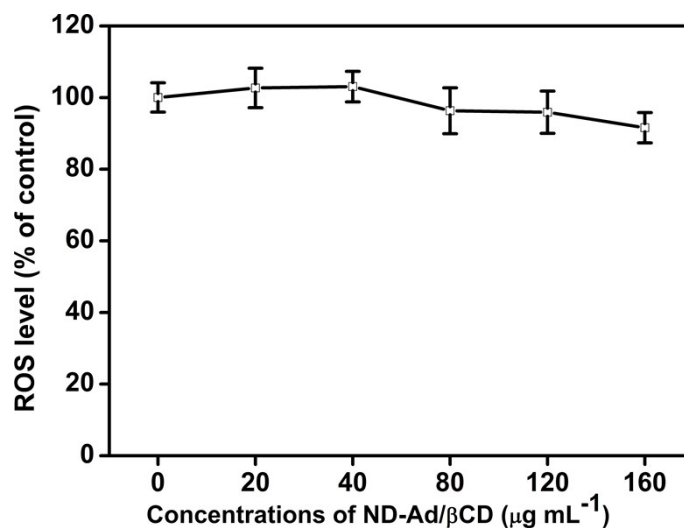

**Fig. S3** ROS generation of cells after they were incubated with different concentrations of ND-Ad/β-CD for 24 h.
